# Supplementary material for: Comparison of the major virulence-related genes of Listeria monocytogenes in Internalin A truncated strain 36-25-1 and a clinical wild-type strain
Source: PubMed Central journal article supplement (PMC3917698; doi:10.1186/1471-2180-14-15), 2014-01-28
Supplement: 1471-2180-14-15-S1.pdf [file 1471-2180-14-15-S1.pdf]

EGDe inlA 1 GTGAGAAAAAACGATATGTATGGTTGAAAAGTATACTAGTAGCAATATTAGTATTTGGC 60  
V R K K R Y V W L K S I L V A I L V F G  
36-25-1 inlA GTGAGAAAAAACGATATGTATGGTTGAAAAGTATACTAGTAGCAATATTAGTATTTGGC  
V R K K R Y V W L K S I L V A I L V F G  
Lma10 inlA GTGAGAAAAAACGATATGTATGGTTGAAAAGTATACTAGTAGCAATATTAGTATTTGGC  
V R K K R Y V W L K S I L V A I L V F G  
Lma13 inlA GTGAGAAAAAACGATATGTATGGTTGAAAAGTATACTAGTAGCAATATTAGTATTTGGC  
V R K K R Y V W L K S I L V A I L V F G  
Lma20 inlA GTGAGAAAAAACGATATGTATGGTTGAAAAGTATACTAGTAGCAATATTAGTATTTGGC  
V R K K R Y V W L K S I L V A I L V F G  
Lma28 inlA GTGAGAAAAAACGATATGTATGGTTGAAAAGTATACTAGTAGCAATATTAGTATTTGGC  
V R K K R Y V W L K S I L V A I L V F G

EGDe inlA 61 AGCGGAGTATGGATTAACACGAGTAACGGGACAAATGCTCAGGCAGCTACAATTACACAA 120  
S G V W I N T S N G T N A Q A A T I T Q  
36-25-1 inlA AGCGGAGTATGGATTAACACGAGTAACGGGACAAATGCTCAGGCAGCTACAATTACACAA  
S G V W I N T S N G T N A Q A A T I T Q  
Lma10 inlA AGCGGAGTATGGATTAACACGAGTAACGGGACAAATGCTCAGGCAGCTACAATTACACAA  
S G V W I N T S N G T N A Q A A T I T Q  
Lma13 inlA AGCGGAGTATGGATTAACACGAGTAACGGGACAAATGCTCAGGCAGCTACAATTACACAA  
S G V W I N T S N G T N A Q A A T I T Q  
Lma20 inlA AGCGGAGTATGGATTAACACGAGTAACGGGACAAATGCTCAGGCAGCTACAATTACACAA  
S G V W I N T S N G T N A Q A A T I T Q  
Lma28 inlA AGTGGAGTATGGATTAACACGAGTAACGGGACAAATGCTCAGGCAGCTACAATTACACAA  
S G V W I N T S N G T N A Q A A T I T Q

EGDe inlA 121 GATACTCCTATTAATCAGATTTTTTACAGATACAGCTCTAGCGGAAAAAATGAAGACGGTC 180  
D T P I N Q I F T D T A L A E K M K T V  
36-25-1 inlA GATACTCCTATTAATCAGATTTTTTACAGATACAGCTCTAGCGGAAAAAATGAAGACGGTC  
D T P I N Q I F T D T A L A E K M K T V  
Lma10 inlA GATACTCCTATTAATCAGATTTTTTACAGATACAGCTCTAGCGGAAAAAATGAAGACGGTC  
D T P I N Q I F T D T A L A E K M K T V  
Lma13 inlA GATACTCCTATTAATCAGATTTTTTACAGATACAGCTCTAGCGGAAAAAATGAAGACGGTC  
D T P I N Q I F T D T A L A E K M K T V  
Lma20 inlA GATACTCCTATTAATCAGATTTTTTACAGATACAGCTCTAGCGGAAAAAATGAAGACGGTC  
D T P I N Q I F T D T A L A E K M K T V  
Lma28 inlA GATACTCCTATTAATCAGATTTTTTACAGATCGCAGCTCTAGCGGAAAAAATGAAGACGGTC  
D T P I N Q I F T D A A L A E K M K T V

EGDe inlA 181 TTAGGAAAAACGAATGTAACAGACACGGTCTCACAAACAGATCTAGACCAAGTTACAACG 240  
L G K T N V T D T V S Q T D L D Q V T T  
36-25-1 inlA TTAGGAAAAACGAATGTAACAGACACGGTCTCACAAACAGATCTAGACCAAGTTACAACG  
L G K T N V T D T V S Q T D L D Q V T T  
Lma10 inlA TTAGGAAAAACGAATGTAACAGACACGGTCTCACAAACAGATCTAGACCAAGTTACAACG  
L G K T N V T D T V S Q T D L D Q V T T  
Lma13 inlA TTAGGAAAAACGAATGTAACAGACACGGTCTCACAAACAGATCTAGACCAAGTTACAACG  
L G K T N V T D T V S Q T D L D Q V T T  
Lma20 inlA TTAGGAAAAACGAATGTAACAGACACGGTCTCACAAACAGATCTAGACCAAGTTACAACG  
L G K T N V T D T V S Q T D L D Q V T T  
Lma28 inlA TTAGGAAAAACGAATGTAACAGACACGGTCTCACAAACAGATCTAGACCAAGTTACGACG  
L G K T N V T D T V S Q T D L D Q V T T

EGDe in1A 241 C TTCAGGCGGATAGATTAGGGATAAAAATCTATCGATGGAGTGGAAATACTTGAACAATTTA 300  
L Q A D R L G I K S I D G V E Y L N N L  
36-25-1 in1A C TTCAGGCGGATAGATTAGGGATAAAAATCTATCGATGGAGTGGAAATACTTGAACAATTTA  
L Q A D R L G I K S I D G V E Y L N N L  
Lma10 in1A C TTCAGGCGGATAGGTTAGGGATAAAAATCTATCGATGGAGTGGAAATACTTGAACAATTTA  
L Q A D R L G I K S I D G V E Y L N N L  
Lma13 in1A C TTCAGGCGGATAGGTTAGGGATAAAAATCTATCGATGGAGTGGAAATACTTGAACAATTTA  
L Q A D R L G I K S I D G V E Y L N N L  
Lma20 in1A C TTCAGGCGGATAGGTTAGGGATAAAAATCTATCGATGGAGTGGAAATACTTGAACAATTTA  
L Q A D R L G I K S I D G V E Y L N N L  
Lma28 in1A C TTCAGGCGGATAGGTTAGGGATAAAAATCTATCGATGGAGTGGAAATACTTGAACAATTTA  
L Q A D R L G I K S I D G V E Y L N N L

EGDe in1A 301 A CACAAAATAAAATTTTCAGCAATAATCAACTTACGGACATAACGCCACTTAAAAATTTAACT 360  
T Q I N F S N N Q L T D I T P L K N L T  
36-25-1 in1A A CACAAAATAAAATTTTCAGCAATAATCAACTTACGGACATAACGCCACTTAAAAATTTAACT  
T Q I N F S N N Q L T D I T P L K N L T  
Lma10 in1A A CACAAAATAAAATTTTCAGCAATAATCAACTTACGGACATAACGCCACTTAAAAATTTAACT  
T Q I N F S N N Q L T D I T P L K N L T  
Lma13 in1A A CACAAAATAAAATTTTCAGCAATAATCAACTTACGGACATAACGCCACTTAAAAATTTAACT  
T Q I N F S N N Q L T D I T P L K N L T  
Lma20 in1A A CACAAAATAAAATTTTCAGCAATAATCAACTTACGGACATAACGCCACTTAAAAATTTAACT  
T Q I N F S N N Q L T D I T P L K N L T  
Lma28 in1A A CACAAAATAAAATTTTCAGCAATAATCAACTTACGGACATAACGCCACTTAAAAATTTAACT  
T Q I N F S N N Q L T D I T P L K N L T

EGDe in1A 361 A AGTTAGTTGATATTTTGATGAATAATAATCAAATAGCAGATATAAATCCGCTAGCTAAT 420  
K L V D I L M N N N Q I A D I T P L A N  
36-25-1 in1A A AGTTAGTTGATATTTTGATGAATAATAATCAAATAGCAGATATAAATCCGCTAGCTAAT  
K L V D I L M N N N Q I A D I T P L A N  
Lma10 in1A A AGTTAGTTGATATTTTGATGAATAATAATCAAATAGCAGATATAAATCCGCTAGCTAAT  
K L V D I L M N N N Q I A D I T P L A N  
Lma13 in1A A AGTTAGTTGATATTTTGATGAATAATAATCAAATAGCAGATATAAATCCGCTAGCTAAT  
K L V D I L M N N N Q I A D I T P L A N  
Lma20 in1A A AGTTAGTTGATATTTTGATGAATAATAATCAAATAGCAGATATAAATCCGCTAGCTAAT  
K L V D I L M N N N Q I A D I T P L A N  
Lma28 in1A A AGTTAGTTGATATTTTGATGAATAATAATCAAATAGCAGATATAAATCCGCTAGCTAAT  
K L V D I L M N N N Q I A D I T P L A N

EGDe in1A 421 T TGACGAATCTAACTGGTTTGACTTTGTTCAACAATCAGATAACGGATATAGACCCGCTT 480  
L T N L T G L T L F N N Q I T D I D P L  
36-25-1 in1A T TGACGAATCTAACTGGTTTGACTTTGTTCAACAATCAGATAACGGATATAGACCCGCTT  
L T N L T G L T L F N N Q I T D I D P L  
Lma10 in1A T TGACGAATCTAACTGGTTTGACTTTGTTCAACAATCAGATAACGGATATAGACCCGCTT  
L T N L T G L T L F N N Q I T D I D P L  
Lma13 in1A T TGACGAATCTAACTGGTTTGACTTTGTTCAACAATCAGATAACGGATATAGACCCGCTT  
L T N L T G L T L F N N Q I T D I D P L  
Lma20 in1A T TGACGAATCTAACTGGTTTGACTTTGTTCAACAATCAGATAACGGATATAGACCCGCTT  
L T N L T G L T L F N N Q I T D I D P L  
Lma28 in1A T TGACGAATCTAACTGGTTTGACTTTGTTCAACAATCAGATAACGGATCTAGACCCGCTT  
L T N L T G L T L F N N Q I T D L D P L

EGDe in1A 481 AAAAAATCTAACAAATTTAAATCGGCTAGAACTATCCAGTAACACGATTAGTGATATTAGT 540  
K N L T N L N R L E L S S N T I S D I S  
36-25-1 in1A AAAAAATCTAACAAATTTAAATCGGCTAGAACTATCCAGTAACACGATTAGTGATATTAGT  
K N L T N L N R L E L S S N T I S D I S  
Lma10 in1A AAAAAATCTAACAAATTTAAATCGGCTAGAACTATCCAGTAACACGATTAGTGATATTAGT  
K N L T N L N R L E L S S N T I S D I S  
Lma13 in1A AAAAAATCTAACAAATTTAAATCGGCTAGAACTATCCAGTAACACGATTAGTGATATTAGT  
K N L T N L N R L E L S S N T I S D I S  
Lma20 in1A AAAAAATCTAACAAATTTAAATCGGCTAGAACTATCCAGTAACACGATTAGTGATATTAGT  
K N L T N L N R L E L S S N T I S D I S  
Lma28 in1A AAAAAATCTAACAAATTTAAATCGGCTAGAACTATCTAGTAACACGATTAGTGATATTAGT  
K N L T N L N R L E L S S N T I S D I S

EGDe in1A 541 GCGCTTTCAGGTTTAACTAGTCTACAGCAATTATCTTTTGGTAATCAAGTGACAGATTTA 600  
A L S G L T S L Q Q L S F G N Q V T D L  
36-25-1 in1A GCGCTTTCAGGTTTAACTAGTCTACAGCAATTATCTTTTGGTAATCAAGTGACAGATTTA  
A L S G L T S L Q Q L S F G N Q V T D L  
Lma10 in1A GCGCTTTCAGGTTTAACTAGTCTACAGCAATTATCTTTTGGTAATCAAGTGACAGATTTA  
A L S G L T S L Q Q L S F G N Q V T D L  
Lma13 in1A GCGCTTTCAGGTTTAACTAGTCTACAGCAATTATCTTTTGGTAATCAAGTGACAGATTTA  
A L S G L T S L Q Q L S F G N Q V T D L  
Lma20 in1A GCGCTTTCAGGTTTAACTAGTCTACAGCAATTATCTTTTGGTAATCAAGTGACAGATTTA  
A L S G L T S L Q Q L S F G N Q V T D L  
Lma28 in1A GCGCTTTCAGGTTTAACTAGTCTACAGCAATTATCTTTTGGTAATCAAGTGACAGATTTA  
A L S G L T S L Q Q L S F G N Q V T D L

EGDe in1A 601 AAACCATTAGCTAATTTAACAACACTAGAACGACTAGATATTTCAAGTAATAAGGTGTCTG 660  
K P L A N L T T L E R L D I S S N K V S  
36-25-1 in1A AAACCATTAGCTAATTTAACAACACTAGAACGACTAGATATTTCAAGTAATAAGGTGTCTG  
K P L A N L T T L E R L D I S S N K V S  
Lma10 in1A AAACCATTAGCTAATTTAACAACACTAGAACGACTAGATATTTCAAGTAATAAGGTGTCTG  
K P L A N L T T L E R L D I S S N K V S  
Lma13 in1A AAACCATTAGCTAATTTAACAACACTAGAACGACTAGATATTTCAAGTAATAAGGTGTCTG  
K P L A N L T T L E R L D I S S N K V S  
Lma20 in1A AAACCATTAGCTAATTTAACAACACTAGAACGACTAGATATTTCAAGTAATAAGGTGTCTG  
K P L A N L T T L E R L D I S S N K V S  
Lma28 in1A AAACCATTAGCTAATTTAACAACACTAGAACGACTAGATATTTCAAGTAATAAGGTGTCTG  
K P L A N L T T L E R L D I S S N K V S

EGDe in1A 661 GATATTAGTGTTCTGGCTAAATTAACCAATTTAGAAAAGTCTTATCGCTACTAACAACCAA 720  
D I S V L A K L T N L E S L I A T N N Q  
36-25-1 in1A GATATTAGTGTTCTGGCTAAATTAACCAATTTAGAAAAGTCTTATCGCTACTAACAACCAA  
D I S V L A K L T N L E S L I A T N N Q  
Lma10 in1A GATATTAGTGTTCTGGCTAAATTAACCAATTTAGAAAAGTCTTATCGCTACTAACAACCAA  
D I S V L A K L T N L E S L I A T N N Q  
Lma13 in1A GATATTAGTGTTCTGGCTAAATTAACCAATTTAGAAAAGTCTTATCGCTACTAACAACCAA  
D I S V L A K L T N L E S L I A T N N Q  
Lma20 in1A GATATTAGTGTTCTGGCTAAATTAACCAATTTAGAAAAGTCTTATCGCTACTAACAACCAA  
D I S V L A K L T N L E S L I A T N N Q  
Lma28 in1A GATATTAGTGTTCTGGCTAAATTAACCAATTTAGAAAAGTCTTATCGCTACTAACAACCAA  
D I S V L A K L T N L E S L I A T N N Q

EGDe inlA 721 ATAAGTGATATAACTCCACTTGGGATTTTAACAAATTTGGACGAATTATCCTTAAATGGT 780  
I S D I T P L G I L T N L D E L S L N G  
36-25-1 inlA ATAAGTGATATAACTCCACTTGGGATTTTAACAAATTTGGACGAATTATCCTTAAATGGT  
I S D I T P L G I L T N L D E L S L N G  
Lma10 inlA ATAAGTGATATAACTCCACTTGGGATTTTAACAAATTTGGACGAATTATCCTTAAATGGT  
I S D I T P L G I L T N L D E L S L N G  
Lma13 inlA ATAAGTGATATAACTCCACTTGGGATTTTAACAAATTTGGACGAATTATCCTTAAATGGT  
I S D I T P L G I L T N L D E L S L N G  
Lma20 inlA ATAAGTGATATAACTCCACTTGGGATTTTAACAAATTTGGACGAATTATCCTTAAATGGT  
I S D I T P L G I L T N L D E L S L N G  
Lma28 inlA ATAAGTGATATAACTCCACTTGGGATTTTAACAAATTTGGACGAATTATCCTTAAATGGT  
I S D I T P L G I L T N L D E L S L N G

EGDe inlA 781 AACCGTTAAAAGATATAGGCACATTGGCGAGTTTAACAAACCTTACAGATTTAGATTTA 840  
N Q L K D I G T L A S L T N L T D L D L  
36-25-1 inlA AACCGTTAAAAGATATAGGCACATTGGCGAGTTTAACAAACCTTACAGATTTAGATTTA  
N Q L K D I G T L A S L T N L T D L D L  
Lma10 inlA AACCGTTAAAAGATATAGGCACATTGGCGAGTTTAACAAACCTTACAGATTTAGATTTA  
N Q L K D I G T L A S L T N L T D L D L  
Lma13 inlA AACCGTTAAAAGATATAGGCACATTGGCGAGTTTAACAAACCTTACAGATTTAGATTTA  
N Q L K D I G T L A S L T N L T D L D L  
Lma20 inlA AACCGTTAAAAGATATAGGCACATTGGCGAGTTTAACAAACCTTACAGATTTAGATTTA  
N Q L K D I G T L A S L T N L T D L D L  
Lma28 inlA AACCGTTAAAAGATATAGGCACATTGGCGAGTTTAACAAACCTTACAGATTTAGATTTA  
N Q L K D I G T L A S L T N L T D L D L

EGDe inlA 841 GCAAATAACCAAATTAGTAATCTAGCACCACTGTCGGGTCTAACAAAACCTAAGTGGT 900  
A N N Q I S N L A P L S G L T K L T E L  
36-25-1 inlA GCAAATAACCAAATTAGTAATCTAGCACCACTGTCGGGTCTAACAAAACCTAAGTGGT  
A N N Q I S N L A P L S G L T K L T E L  
Lma10 inlA GCAAATAACCAAATTAGTAATCTAGCACCACTGTCGGGTCTAACAAAACCTAAGTGGT  
A N N Q I S N L A P L S G L T K L T E L  
Lma13 inlA GCAAATAACCAAATTAGTAATCTAGCACCACTGTCGGGTCTAACAAAACCTAAGTGGT  
A N N Q I S N L A P L S G L T K L T E L  
Lma20 inlA GCAAATAACCAAATTAGTAATCTAGCACCACTGTCGGGTCTAACAAAACCTAAGTGGT  
A N N Q I S N L A P L S G L T K L T E L  
Lma28 inlA GCAAATAACCAAATTAGTAATCTAGCACCACTGTCGGGTCTAACAAAACCTAAGTGGT  
A N N Q I S N L A P L S G L T K L T E L

EGDe inlA 901 AAACCTGGAGCTAACCAAATAAGTAACATCAGTCCCCTAGCAGGTTTAACCGCACTCACT 960  
K L G A N Q I S N I S P L A G L T A L T  
36-25-1 inlA AAACCTGGAGCTAACCAAATAAGTAACATCAGTCCCCTAGCAGGTTTAACCGCACTCACT  
K L G A N Q I S N I S P L A G L T A L T  
Lma10 inlA AAACCTGGAGCTAACCAAATAAGTAACATCAGTCCCCTAGCAGGTTTAACCGCACTCACT  
K L G A N Q I S N I S P L A G L T A L T  
Lma13 inlA AAACCTGGAGCTAACCAAATAAGTAACATCAGTCCCCTAGCAGGTTTAACCGCACTCACT  
K L G A N Q I S N I S P L A G L T A L T  
Lma20 inlA AAACCTGGAGCTAACCAAATAAGTAACATCAGTCCCCTAGCAGGTTTAACCGCACTCACT  
K L G A N Q I S N I S P L A G L T A L T  
Lma28 inlA AAACCTGGAGCTAACCAAATAAGTAACATCAGTCCCCTAGCAGGTTTAACCGCACTCACT  
K L G A N Q I S N I S P L A G L T A L T

EGDe inlA 961 AACTTAGAGCTTAATGAAAATCAGCTGGAAGATATTAGCCCAATTTCTAACCTGAAAAAT 1020  
N L E L N E N Q L E D I S P I S N L K N  
36-25-1 inlA AACTTAGAGCTTAATGAAAATCAGCTGGAAGATATTAGCCCAATTTCTAACCTGAAAAAT  
N L E L N E N Q L E D I S P I S N L K N  
Lma10 inlA AACTTAGAGCTTAATGAAAATCAGCTGGAAGATATTAGCCCAATTTCTAACCTGAAAAAT  
N L E L N E N Q L E D I S P I S N L K N  
Lma13 inlA AACTTAGAGCTTAATGAAAATCAGCTGGAAGATATTAGCCCAATTTCTAACCTGAAAAAT  
N L E L N E N Q L E D I S P I S N L K N  
Lma20 inlA AACTTAGAGCTTAATGAAAATCAGCTGGAAGATATTAGCCCAATTTCTAACCTGAAAAAT  
N L E L N E N Q L E D I S P I S N L K N  
Lma28 inlA AACTTAGAGCTTAATGAAAATCAGCTGGAAGATATTAGCCCAATTTCTAACCTGAAAAAT  
N L E L N E N Q L E D I S P I S N L K N

EGDe inlA 1021 CTCACATATTTAACTTTGTACTTTAATAATATAAGTGATATAAGCCCAGTTTCTAGTTTA 1080  
L T Y L T L Y F N N I S D I S P V S S L  
36-25-1 inlA CTCACATATTTAACTTTGTACTTTAATAATATAAGTGATATAAGCCCAGTTTCTAGTTTA  
L T Y L T L Y F N N I S D I S P V S S L  
Lma10 inlA CTCACATATTTAACTTTGTACTTTAATAATATAAGTGATATAAGCCCAGTTTCTAGTTTA  
L T Y L T L Y F N N I S D I S P V S S L  
Lma13 inlA CTCACATATTTAACTTTGTACTTTAATAATATAAGTGATATAAGCCCAGTTTCTAGTTTA  
L T Y L T L Y F N N I S D I S P V S S L  
Lma20 inlA CTCACATATTTAACTTTGTACTTTAATAATATAAGTGATATAAGCCCAGTTTCTAGTTTA  
L T Y L T L Y F N N I S D I S P V S S L  
Lma28 inlA CTCACATATTTAACTTTGTACTTTAATAATATAAGTGATATAAGCCCAGTTTCTAGTTTA  
L T Y L T L Y F N N I S D I S P V S S L

EGDe inlA 1081 ACAAAGCTTCAAAGATTATTTTTCTATAATAACAAGGTAAGTGACGTAAGCTCAC TTGCG 1140  
T K L Q R L F F Y N N K V S D V S S L A  
36-25-1 inlA ACAAAGCTTCAAAGATTATTTTTCTATAATAACAAGGTAAGTGACGTAAGCTCAC TTGCG  
T K L Q R L F F Y N N K V S D V S S L A  
Lma10 inlA ACAAAGCTTCAAAGATTATTTTTCTATAATAACAAGGTAAGTGACGTAAGCTCAC TTGCG  
T K L Q R L F F Y N N K V S D V S S L A  
Lma13 inlA ACAAAGCTTCAAAGATTATTTTTCTATAATAACAAGGTAAGTGACGTAAGCTCAC TTGCG  
T K L Q R L F F Y N N K V S D V S S L A  
Lma20 inlA ACAAAGCTTCAAAGATTATTTTTCTATAATAACAAGGTAAGTGACGTAAGCTCAC TTGCG  
T K L Q R L F F Y N N K V S D V S S L A  
Lma28 inlA ACAAAGCTTCAAAGATTATTTTTCTATAATAACAAGGTAAGTGACGTAAGCTCAC TTGCG  
T K L Q R L F F Y N N K V S D V S S L A

EGDe inlA 1141 AACTTAACAAATATTAATTGGCTTTTCAGCTGGGCATAACCAAATTAGCGATCTTACACCA 1200  
N L T N I N W L S A G H N Q I S D L T P  
36-25-1 inlA AACTTAACAAATATTAATTGGCTTTTCAGCTGGGCATAACCAAATTAGCGATCTTACACCA  
N L T N I N W L S A G H N Q I S D L T P  
Lma10 inlA AACTTAACAAATATTAATTGGCTTTTCAGCTGGGCATAACCAAATTAGCGATCTTACACCA  
N L T N I N W L S A G H N Q I S D L T P  
Lma13 inlA AACTTAACAAATATTAATTGGCTTTTCAGCTGGGCATAACCAAATTAGCGATCTTACACCA  
N L T N I N W L S A G H N Q I S D L T P  
Lma20 inlA AACTTAACAAATATTAATTGGCTTTTCAGCTGGGCATAACCAAATTAGCGATCTTACACCA  
N L T N I N W L S A G H N Q I S D L T P  
Lma28 inlA AACTTAACAAATATTAATTGGCTTTTCAGCTGGGCATAACCAAATTAGCGATCTTACACCA  
N L T N I N W L S A G H N Q I S D L T P

EGDe inlA 1201 TTGGCTAATTTAACAAGAATCACCCAACCTAGGGTTGAATGATCAAGCATGGACAAATGCA 1260  
L A N L T R I T Q L G L N D Q A W T N A  
36-25-1 inlA TTGGCTAATTTAACAAGAATCACCCAACCTAGGGTTGAATGATCAAGCATGGACAAATGCA  
L A N L T R I T Q L G L N D Q A W T N A  
Lma10 inlA TTGGCTAATTTAACAAGAATCACCCAACCTAGGGTTGAATGATCAAGCATGGACAAATGCA  
L A N L T R I T Q L G L N D Q A W T N A  
Lma13 inlA TTGGCTAATTTAACAAGAATCACCCAACCTAGGGTTGAATGATCAAGCATGGACAAATGCA  
L A N L T R I T Q L G L N D Q A W T N A  
Lma20 inlA TTGGCTAATTTAACAAGAATCACCCAACCTAGGGTTGAATGATCAAGCATGGACAAATGCA  
L A N L T R I T Q L G L N D Q A W T N A  
Lma28 inlA TTGGCTAATTTAACAAGAATCACCCAACCTAGGGTTGAATGATCAAGCATGGACAAATGCA  
L A N L T R I T Q L G L N D Q A W T N A

EGDe inlA 1261 CCAGTAAACTACAAAGCAAATGTATCCATTCCAAACACGGTGAAAAATGTGACTGGCGCT 1320  
P V N Y K A N V S I P N T V K N V T G A  
36-25-1 inlA CCAGTAAACTACAAAGCAAATGTATCCATTCCAAACACGGTGAAAAATGTGACTGGCGCT  
P V N Y K A N V S I P N T V K N V T G A  
Lma10 inlA CCAGTAAACTACAAAGCAAATGTATCCATTCCAAACACGGTGAAAAATGTGACTGGCGCT  
P V N Y K A N V S I P N T V K N V T G A  
Lma13 inlA CCAGTAAACTACAAAGCAAATGTATCCATTCCAAACACGGTGAAAAATGTGACTGGCGCT  
P V N Y K A N V S I P N T V K N V T G A  
Lma20 inlA CCAGTAAACTACAAAGCAAATGTATCCATTCCAAACACGGTGAAAAATGTGACTGGCGCT  
P V N Y K A N V S I P N T V K N V T G A  
Lma28 inlA CCAGTAAACTACAAAGCAAATGTATCCATTCCAAACACGGTGAAAAATGTGACTGGCGCT  
P V N Y K A N V S I P N T V K N V T G A

EGDe inlA 1321 TTAATTGCACCAGCTACTATTAGCGATGGCGGTAGTTACACAGAGCCTGATATAACATGG 1380  
L I A P A T I S D G G S Y T E P D I T W  
36-25-1 inlA TTAATTGCACCAGCTACTATTAGCGATGGCGGTAGTTACACAGAGCCTGATATAACATGG  
L I A P A T I S D G G S Y T E P D I T W  
Lma10 inlA TTAATTGCACCAGCTACTATTAGCGATGGCGGTAGTTACACAGAGCCTGATATAACATGG  
L I A P A T I S D G G S Y T E P D I T W  
Lma13 inlA TTAATTGCACCAGCTACTATTAGCGATGGCGGTAGTTACACAGAGCCTGATATAACATGG  
L I A P A T I S D G G S Y T E P D I T W  
Lma20 inlA TTAATTGCACCAGCTACTATTAGCGATGGCGGTAGTTACACAGAGCCTGATATAACATGG  
L I A P A T I S D G G S Y T E P D I T W  
Lma28 inlA TTGATTGCACCAGCTACTATTAGCGATGGTGGTAGTTATGCAGAACCTGATATAACATGG  
L I A P A T I S D G G S Y A E P D I T W

EGDe inlA 1381 AACTTACCTAGTTATACAAATGAAGTAAGCTATACCTTTAGCCAACCTGTCACATTTGGA 1440  
N L P S Y T N E V S Y T F S Q P V T I G  
36-25-1 inlA AACTTACCTAGTTATACAAATGAAGTAAGCTATACCTTTAGCCAACCTGTCACATTTGGA  
N L P S Y T N E V S Y T F S Q P V T I G  
Lma10 inlA AACTTACCTAGTTATACAAATGAAGTAAGCTATACCTTTAGCCAACCTGTCACATTTGGA  
N L P S Y T N E V S Y T F S Q P V T I G  
Lma13 inlA AACTTACCTAGTTATACAAATGAAGTAAGCTATACCTTTAGCCAACCTGTCACATTTGGA  
N L P S Y T N E V S Y T F S Q P V T I G  
Lma20 inlA AACTTACCTAGTTATACAAATGAAGTAAGCTATACCTTTAGCCAACCTGTCACATTTGGA  
N L P S Y T N E V S Y T F S Q P V T I G  
Lma28 inlA AACTTACCTAGTTATACGAATGAAGTAAGTTATACCTTTAACCAATCTGTCCACTTTGGA  
N L P S Y T N E V S Y T F N Q S V T I G

EGDe inlA 1441 AAAGGAACGACAACATTTAGTGGAAACCGTGACGCAGCCACTTAAGGCAATTTTAAATGTT 1500  
K G T T T F S G T V T Q P L K A I F N V  
36-25-1 inlA AAAGGAACGACAACATTTAGTGGAAACCGTGACGCAGCCACTTAAGGCAATTTTAAATGTT  
K G T T T F S G T V T Q P L K A I F N V  
Lma10 inlA AAAGGAACGACAACATTTAGTGGAAACCGTGACGCAGCCACTTAAGGCAATTTTAAATGTT  
K G T T T F S G T V T Q P L K A I F N V  
Lma13 inlA AAAGGAACGACAACATTTAGTGGAAACCGTGACGCAGCCACTTAAGGCAATTTTAAATGTT  
K G T T T F S G T V T Q P L K A I F N V  
Lma20 inlA AAAGGAACGACAACATTTAGTGGAAACCGTGACGCAGCCACTTAAGGCAATTTTAAATGTT  
K G T T T F S G T V T Q P L K A I F N V  
Lma28 inlA AAAGGAACGACAACATTTAGTGGAACTGTGACGTAGCCACTTAAGGCAATTTTAAATGCT  
K G T T T F S G T V T \* P L K A I F N A

EGDe inlA 1501 AAGTTTCATGTGGACGGCAAAGAAACAACCAAAGAAGTGAAGCTGGGAATTTATTGACT 1560  
K F H V D G K E T T K E V E A G N L L T  
36-25-1 inlA AAGTTTCATGTGGACGGCAAAGAAACAACCAAAGAAGTGAAGCTGGGAATTTATTGACT  
K F H V D G K E T T K E V E A G N L L T  
Lma10 inlA AAGTTTCATGTGGACGGCAAAGAAACAACCAAAGAAGTGAAGCTGGGAATTTATTGACT  
K F H V D G K E T T K E V E A G N L L T  
Lma13 inlA AAGTTTCATGTGGACGGCAAAGAAACAACCAAAGAAGTGAAGCTGGGAATTTATTGACT  
K F H V D G K E T T K E V E A G N L L T  
Lma20 inlA AAGTTTCATGTGGACGGCAAAGAAACAACCAAAGAAGTGAAGCTGGGAATTTATTGACT  
K F H V D G K E T T K E V E A G N L L T  
Lma28 inlA AAGTTTCATGTGGACGGCAAAGAAACAACCAAAGAAGTGAAGCTGGGAATTTATTGACT  
K F H V D G K E T T K E V E A G N L L T

EGDe inlA 1561 GAACCAGCTAAGCCCGTAAAAGAAGGTCACACATTTGTTGGTTGGTTTGATGCCCAAACA 1620  
E P A K P V K E G H T F V G W F D A Q T  
36-25-1 inlA GAACCAGCTAAGCCCGTAAAAGAAGGTCACACATTTGTTGGTTGGTTTGATGCCCAAACA  
E P A K P V \* E G H T F V G W F D A Q T  
Lma10 inlA GAACCAGCTAAGCCCGTAAAAGAAGGTCACACATTTGTTGGTTGGTTTGATGCCCAAACA  
E P A K P V K E G H T F V G W F D A Q T  
Lma13 inlA GAACCAGCTAAGCCCGTAAAAGAAGGTCACACATTTGTTGGTTGGTTTGATGCCCAAACA  
E P A K P V K E G H T F V G W F D A Q T  
Lma20 inlA GAACCAGCTAAGCCCGTAAAAGAAGGTCACACATTTGTTGGTTGGTTTGATGCCCAAACA  
E P A K P V K E G H T F V G W F D A Q T  
Lma28 inlA GAACCAGCTAAGCCGTAAAAGAAGGTTACACATTTATTGGGTGGTTTGATGCCCAAACA  
E P A K P V K E G Y T F I G W F D A K T

EGDe inlA 1621 GGCGGAACTAAATGGAATTTTCAGTACGGATAAAATGCCGACAAATGACATCAATTTATAT 1680  
G G T K W N F S T D K M P T N D I N L Y  
36-25-1 inlA GGCGGAACTAAATGGAATTTTCAGTACGGATAAAATGCCGACAAATGACATCAATTTATAT  
G G T K W N F S T D K M P T N D I N L Y  
Lma10 inlA GGCGGAACTAAATGGAATTTTCAGTACGGATAAAATGCCGACAAATGACATCAATTTATAT  
G G T K W N F S T D K M P T N D I N L Y  
Lma13 inlA GGCGGAACTAAATGGAATTTTCAGTACGGATAAAATGCCGACAAATGACATCAATTTATAT  
G G T K W N F S T D K M P T N D I N L Y  
Lma20 inlA GGCGGAACTAAATGGAATTTTCAGTACGGATAAAATGCCGACAAATGACATCAATTTATAT  
G G T K W N F S T D K M P T N D I N L Y  
Lma28 inlA GGTGGAACTAAATGGAATTTTCAGTACGGATAAAATGCCGACAAATGACATCGATTTATAT  
G G T K W N F S T D K M P T N D I D L Y

EGDe inlA 1681 GCACAATTTAGTATTAACAGCTACACAGCAACCTTTGATAATGACGGTGTAAACAACATCT 1740  
A Q F S I N S Y T A T F D N D G V T T S  
36-25-1 inlA GCACAATTTAGTATTAACAGCTACACAGCAACCTTTGATAATGACGGTGTAAACAACATCT  
A Q F S I N S Y T A T F D N D G V T T S  
Lma10 inlA GCACAATTTAGTATTAACAGCTACACAGCAACCTTTGATAATGACGGTGTAAACAACATCT  
A Q F S I N S Y T A T F D N D G V T T S  
Lma13 inlA GCACAATTTAGTATTAACAGCTACACAGCAACCTTTGATAATGACGGTGTAAACAACATCT  
A Q F S I N S Y T A T F D N D G V T T S  
Lma20 inlA GCACAATTTAGTATTAACAGCTACACAGCAACCTTTGATAATGACGGTGTAAACAACATCT  
A Q F S I N S Y T A T F D N D G V T T S  
Lma28 inlA GCGCAATTTAGTATTAACAGCTACACAGCAACCTTTGGATAATGACGGTGTAAACAACATCT  
A Q F S I N S Y T A T L D N D G V T T S

EGDe inlA 1741 CAAACAGTAGATTATCAAGGCTTGTTACAAGAACCACGGCACCACAAAAGAAGGTTAT 1800  
Q T V D Y Q G L L Q E P T A P T K E G Y  
36-25-1 inlA CAAACAGTAGATTATCAAGGCTTGTTACAAGAACCACGGCACCACAAAAGAAGGTTAT  
Q T V D Y Q G L L Q E P T A P T K E G Y  
Lma10 inlA CAAACAGTAGATTATCAAGGCTTGTTACAAGAACCACGGCACCACAAAAGAAGGTTAT  
Q T V D Y Q G L L Q E P T A P T K E G Y  
Lma13 inlA CAAACAGTAGATTATCAAGGCTTGTTACAAGAACCACGGCACCACAAAAGAAGGTTAT  
Q T V D Y Q G L L Q E P T A P T K E G Y  
Lma20 inlA CAAACAGTAGATTATCAAGGCTTGTTACAAGAACCACGGCACCACAAAAGAAGGTTAT  
Q T V D Y Q G L L Q E P T A P T K E G Y  
Lma28 inlA CAAACAGTAGATTATCAAGGCTTGCTACAAGAACCACGGCACCACAAAAGAAGGTTAT  
Q T V D Y Q G L L Q E P T A P T K E G Y

EGDe inlA 1801 ACTTTTAAAGGCTGGTATGACGCAAAAACCTGGTGGTGACAAGTGGGATTTTCGCAACTAGC 1860  
T F K G W Y D A K T G G D K W D F A T S  
36-25-1 inlA ACTTTTAAAGGCTGGTATGACGCAAAAACCTGGTGGTGACAAGTGGGATTTTCGCAACTAGC  
T F K G W Y D A K T G G D K W D F A T S  
Lma10 inlA ACTTTTAAAGGCTGGTATGACGCAAAAACCTGGTGGTGACAAGTGGGATTTTCGCAACTAGC  
T F K G W Y D A K T G G D K W D F A T S  
Lma13 inlA ACTTTTAAAGGCTGGTATGACGCAAAAACCTGGTGGTGACAAGTGGGATTTTCGCAACTAGC  
T F K G W Y D A K T G G D K W D F A T S  
Lma20 inlA ACTTTTAAAGGCTGGTATGACGCAAAAACCTGGTGGTGACAAGTGGGATTTTCGCAACTAGC  
T F K G W Y D A K T G G D K W D F A T S  
Lma28 inlA ACTTTTAAAGGCTGGTATGACGCAAAAACCTGGCGGTGACAAGTGGGATTTTCGCAACTAGT  
T F K G W Y D A K T G G D K W D F A T S

EGDe inlA 1861 AAAATGCCTGCTAAAAACATCACCTTATATGCCCAATATAGCGCCAATAGCTATACAGCA 1920  
K M P A K N I T L Y A Q Y S A N S Y T A  
36-25-1 inlA AAAATGCCTGCTAAAAACATCACCTTATATGCCCAATATAGCGCCAATAGCTATACAGCA  
K M P A K N I T L Y A Q Y S A N S Y T A  
Lma10 inlA AAAATGCCTGCTAAAAACATCACCTTATATGCCCAATATAGCGCCAATAGCTATACAGCA  
K M P A K N I T L Y A Q Y S A N S Y T A  
Lma13 inlA AAAATGCCTGCTAAAAACATCACCTTATATGCCCAATATAGCGCCAATAGCTATACAGCA  
K M P A K N I T L Y A Q Y S A N S Y T A  
Lma20 inlA AAAATGCCTGCTAAAAACATCACCTTATATGCCCAATATAGCGCCAATAGCTATACAGCA  
K M P A K N I T L Y A Q Y S A N S Y T A  
Lma28 inlA AAGATGCCTGCTAAAAACATCACCTTATATGCTCAATATAGCGCCAATAGCTATACAGCA  
K M P A K N I T L Y A Q Y S A N S Y T A



EGDe inlA 1921 ACGTTTGGATGTTGATGGAAAAATCAACGACTCAAGCAGTAGACTATCAAGGACTTCTAAAA 1980  
T F D V D G K S T T Q A V D Y Q G L L K  
36-25-1 inlA ACGTTTGGATGTTGATGGAAAAATCAACGACTCAAGCAGTAGACTATCAAGGACTTCTAAAA  
T F D V D G K S T T Q A V D Y Q G L L K  
Lma10 inlA ACGTTTGGATGTTGATGGAAAAATCAACGACTCAAGCAGTAGACTATCAAGGACTTCTAAAA  
T F D V D G K S T T Q A V D Y Q G L L K  
Lma13 inlA ACGTTTGGATGTTGATGGAAAAATCAACGACTCAAGCAGTAGACTATCAAGGACTTCTAAAA  
T F D V D G K S T T Q A V D Y Q G L L K  
Lma20 inlA ACGTTTGGATGTTGATGGAAAAATCAACGACTCAAGCAGTAGACTATCAAGGACTTCTAAAA  
T F D V D G K S T T Q A V D Y Q G L L K  
Lma28 inlA ACCTTTGGATGTTGATGGAAAAATCAACGACTCAAGCAGTAGACTATCAAGGACTTCTAAAA  
T F D V D G K T T T Q A V D Y Q G L L K

EGDe inlA 1981 GAACCAAAGGCACCAACGAAAGCCGGATATACTTTCAAAGGCTGGTATGACGAAAAAACA 2040  
E P K A P T K A G Y T F K G W Y D E K T  
36-25-1 inlA GAACCAAAGGCACCAACGAAAGCCGGATATACTTTCAAAGGCTGGTATGACGAAAAAACA  
E P K A P T K A G Y T F K G W Y D E K T  
Lma10 inlA GAACCAAAGGCACCAACGAAAGCCGGATATACTTTCAAAGGCTGGTATGACGAAAAAACA  
E P K A P T K A G Y T F K G W Y D E K T  
Lma13 inlA GAACCAAAGGCACCAACGAAAGCCGGATATACTTTCAAAGGCTGGTATGACGAAAAAACA  
E P K A P T K A G Y T F K G W Y D E K T  
Lma20 inlA GAACCAAAGGCACCAACGAAAGCCGGATATACTTTCAAAGGCTGGTATGACGAAAAAACA  
E P K A P T K A G Y T F K G W Y D E K T  
Lma28 inlA GAACCAAAGGCACCAACGAAAGCCGGATATACTTTCAAAGGCTGGTATGACGAAAAAACA  
E P K T P T K A G Y T F K G W Y D E K T

EGDe inlA 2041 GATGGGAAAAAATGGGATTTTGCACGGATAAAAATGCCAGCAAATGACATTACGCTGTAC 2100  
D G K K W D F A T D K M P A N D I T L Y  
36-25-1 inlA GATGGGAAAAAATGGGATTTTGCACGGATAAAAATGCCAGCAAATGACATTACGCTGTAC  
D G K K W D F A T D K M P A N D I T L Y  
Lma10 inlA GATGGGAAAAAATGGGATTTTGCACGGATAAAAATGCCAGCAAATGACATTACGCTGTAG  
D G K K W D F A T D K M P A N D I T L \*  
Lma13 inlA GATGGGAAAAAATGGGATTTTGCACGGATAAAAATGCCAGCAAATGACATTACGCTGTAG  
D G K K W D F A T D K M P A N D I T L \*  
Lma20 inlA GATGGGAAAAAATGGGATTTTGCACGGATAAAAATGCCAGCAAATGACATTACGCTGTAG  
D G K K W D F A T D K M P A N D I T L \*  
Lma28 inlA GATGGTAAAAAATGGGATTTTGCACAGATAAAAATGCCAGCAAATGATTATTACGCTGTAC  
D G K K W D F A T D K M P A N D I T L Y

EGDe inlA 2101 GCTCAATTTACGAAAAATCCTGTGGCACCACCAACAACCTGGAGGGAACACACCCGCTACA 2160  
A Q F T K N P V A P P T T G G N T P P T  
36-25-1 inlA GCTCAATTTACGAAAAATCCTGTGGCACCACCAACAACCTGGAGGGAACACACCCGCTACA  
A Q F T K N P V A P P T T G G N T P P T  
Lma10 inlA GCTCAATTTACGAAAAATCCTGTGGCACCACCAACAACCTGGAGGGAACACACCCGCTACA  
A Q F T K N P V A P P T T G G N T P P T  
Lma13 inlA GCTCAATTTACGAAAAATCCTGTGGCACCACCAACAACCTGGAGGGAACACACCCGCTACA  
A Q F T K N P V A P P T T G G N T P P T  
Lma20 inlA GCTCAATTTACGAAAAATCCTGTGGCACCACCAACAACCTGGAGGGAACACACCCGCTACA  
A Q F T K N P V A P P T T G G N T P P T  
Lma28 inlA GCTCAATTTACGAAAAATCCTGTGGCACCACCAACAACCTGGAGGGAACACACCCGCTACT  
A Q F T K N P V A P P T T G G N T P P T

EGDe inlA 2161 ACAAATAACGGCGGGAATACTACACCACCTTCCGCAAATATACCTGGAAGCGACACATCT 2220  
T N N G G N T T P P S A N I P G S D T S  
36-25-1 inlA ACAAATAACGGCGGGAATACTACACCACCTTCCGCAAATATACCTGGAAGCGACACATCT  
T N N G G N T T P P S A N I P G S D T S  
Lma10 inlA ACAAATAACGGCGGGAATACTACACCACCTTCCGCAAATATACCTGGAAGCGACACATCT  
T N N G G N T T P P S A N I P G S D T S  
Lma13 inlA ACAAATAACGGCGGGAATACTACACCACCTTCCGCAAATATACCTGGAAGCGACACATCT  
T N N G G N T T P P S A N I P G S D T S  
Lma20 inlA ACAAATAACGGCGGGAATACTACACCACCTTCCGCAAATATACCTGGAAGCGACACATCT  
T N N G G N T T P P S A N I P G S D T S  
Lma28 inlA ACAAATAACGGGAGGGAATACTACACCACCTTCCGCAAATATACCTGGAAGCGACACATCT  
T N N G G N T T P P S A N I P G S D T S

EGDe inlA 2221 AACACATCAACTGGGAATTCAGCCAGCACAACAAGTACAATGAACGCTTATGACCCTTAT 2280  
N T S T G N S A S T T S T M N A Y D P Y  
36-25-1 inlA AACACATCAACTGGGAATTCAGCCAGCACAACAAGTACAATGAACGCTTATGACCCTTAT  
N T S T G N S A S T T S T M N A Y D P Y  
Lma10 inlA AACACATCAACTGGGAATTCAGCCAGCACAACAAGTACAATGAACGCTTATGACCCTTAT  
N T S T G N S A S T T S T M N A Y D P Y  
Lma13 inlA AACACATCAACTGGGAATTCAGCCAGCACAACAAGTACAATGAACGCTTATGACCCTTAT  
N T S T G N S A S T T S T M N A Y D P Y  
Lma20 inlA AACACATCAACTGGGAATTCAGCCAGCACAACAAGTACAATGAACGCTTATGACCCTTAT  
N T S T G N S A S T T S T M N A Y D P Y  
Lma28 inlA AACACATCAACTGGGAATTCAGCCAGCACAACAAGTACAATGAACGCTTATGACCCTTAT  
N T S T G N S A S T T S T M N A Y D P Y

EGDe inlA 2281 AATTCAAAAGAAGCTTCACTCCCCTACAACCTGGCGATAGCGATAATGCGCTCTACCTTTTG 2340  
N S K E A S L P T T G D S D N A L Y L L  
36-25-1 inlA AATTCAAAAGAAGCTTCACTCCCCTACAACCTGGCGATAGCGATAATGCGCTCTACCTTTTG  
N S K E A S L P T T G D S D N A L Y L L  
Lma10 inlA AATTCAAAAGAAGCTTCACTCCCCTACAACCTGGCGATAGCGATAATGCGCTCTACCTTTTG  
N S K E A S L P T T G D S D N A L Y L L  
Lma13 inlA AATTCAAAAGAAGCTTCACTCCCCTACAACCTGGCGATAGCGATAATGCGCTCTACCTTTTG  
N S K E A S L P T T G D S D N A L Y L L  
Lma20 inlA AATTCAAAAGAAGCTTCACTCCCCTACAACCTGGCGATAGCGATAATGCGCTCTACCTTTTG  
N S K E A S L P T T G D S D N A L Y L L  
Lma28 inlA AATTCAAAAGAAGCTTCACTCCCCTACAACCTGGCGATAGCGATAATGCGCTCTACCTTTTG  
N S K E A S L P T T G D S D N A L Y L L

EGDe inlA 2341 TTAGGGTTATTAGCAGTAGGAACTGCAATGGCTCTTACTAAAAAAGCACGTGCTAGTAAA 2400  
L G L L A V G T A M A L T K K A R A S K  
36-25-1 inlA TTAGGGTTATTAGCAGTAGGAACTGCAATGGCTCTTACTAAAAAAGCACGTGCTAGTAAA  
L G L L A V G T A M A L T K K A R A S K  
Lma10 inlA TTAGGGTTATTAGCAGTAGGAACTGCAATGGCTCTTACTAAAAAAGCACGTGCTAGTAAA  
L G L L A V G T A M A L T K K A R A S K  
Lma13 inlA TTAGGGTTATTAGCAGTAGGAACTGCAATGGCTCTTACTAAAAAAGCACGTGCTAGTAAA  
L G L L A V G T A M A L T K K A R A S K  
Lma20 inlA TTAGGGTTATTAGCAGTAGGAACTGCAATGGCTCTTACTAAAAAAGCACGTGCTAGTAAA  
L G L L A V G T A M A L T K K A R A S K  
Lma28 inlA TTAGGGTTATTAGCAGTAGGAACTGCAATGGCTCTTACTAAAAAAGCACGTGCTAGTAAA  
L G L L A V G T A M A L T K K A R A S K

|              |      |     |
|--------------|------|-----|
| EGDe inlA    | 2401 | TAG |
|              |      | *   |
| 36-25-1 inlA |      | TAG |
|              |      | *   |
| Lma10 inlA   |      | TAG |
|              |      | *   |
| Lma13 inlA   |      | TAG |
|              |      | *   |
| Lma20 inlA   |      | TAG |
|              |      | *   |
| Lma28 inlA   |      | TAG |
|              |      | *   |
